1           **Diurnal modulation of multivesicular release controls the**  
2           **efficiency of information transmission at a sensory synapse**

3  
4           José Moya-Díaz, Ben James, Federico Esposti, Jamie Johnston and Leon Lagnado\*

5  
6                       Sussex Neuroscience, School of Life Sciences, University of Sussex,  
7                                               Brighton BN1 9QG, UK

8  
9           \*Corresponding author: [l.lagnado@sussex.ac.uk](mailto:l.lagnado@sussex.ac.uk)

10  
11  
12  
13           **Summary**

14           Neuromodulators adjust sensory circuits to changes in the external world or the  
15           animal's internal state and synapses are key control sites for such plasticity. Less  
16           clear is how neuromodulation alters the amount of information transmitted through the  
17           circuit. We investigated this question in the context of the diurnal regulation of visual  
18           processing in zebrafish, focusing on synapses of retinal bipolar cells. We demonstrate  
19           that contrast-sensitivity peaks in the afternoon accompanied by an average four-fold  
20           increase in the Shannon information transmitted at individual active zones. This  
21           increase reflects higher synaptic gain, lower spontaneous “noise” and reduced  
22           variability of evoked responses. Simultaneously, an increase in the probability of  
23           multivesicular events with larger information content increases the efficiency of  
24           transmission (bits per vesicle) by factors of 2-3. This study demonstrates how the  
25           potentiation of multivesicular release by neuromodulators can increase the synaptic  
26           transfer of information and the efficiency of the vesicle code.

## 28 **Introduction**

29 It has long been understood that the flow of signals through neural circuits is adjusted  
30 by neuromodulators<sup>1</sup>. Less clear is how these alter the amount of information that is  
31 transmitted through the circuit. Here we investigate this question in the context of  
32 visual processing in the retina.

33 The retina is highly plastic: the input-output relation can adapt within seconds to  
34 the recent history of the visual stimulus<sup>2,3</sup> or, on longer time-scales, to changes in the  
35 animal's internal state<sup>4,5</sup>. In diurnal animals, for instance, retinal sensitivity to light is  
36 regulated both by the daily light-dark cycle and by intrinsic circadian clocks<sup>6-8</sup>. Key to  
37 these adjustments is dopamine, a neuromodulator which is released from amacrine  
38 cells in a circadian cycle, varying from a minimum at night, increasing during the day  
39 and peaking before dusk<sup>6,9</sup>. But the average luminance of a visual scene is not the  
40 variable driving most behaviours related to vision: navigation, finding food and avoiding  
41 predators all depend on detection of fast modulations in light intensity. We therefore  
42 investigated the diurnal control of temporal contrast processing, focusing on the visual  
43 signal transmitted by glutamatergic synapses of bipolar cells.

44 Bipolar cells are the bridge between the photoreceptors and ganglion cells that  
45 deliver the results of retinal processing to downstream circuits. Their synaptic  
46 compartments are an important control point for transformations of the visual signal<sup>10</sup>  
47 and contribute to a number of processing tasks, from adaptive gain control to temporal  
48 filtering and the coding of motion, colour, orientation and direction<sup>3,11-13</sup>. Bipolar cells  
49 are similar to other sensory neurons, such as photoreceptors, sensory hair cells and  
50 electroreceptors, in transmitting information through ribbon synapses containing  
51 specialized structures that supply vesicles to the active zone<sup>14</sup>. These sensory  
52 synapses do not always operate as Poisson machines in which vesicles are released  
53 independently but also signal through multivesicular release (MVR), where the fusion  
54 of two or more vesicles is co-ordinated as a single synaptic event<sup>15-17</sup>. The importance  
55 of MVR at a number of sites in the brain is now recognized and it has been suggested

56 that it might contribute to more complex strategies for transmitting information than  
57 modulation of a rate code<sup>18-20</sup>.

58 It is difficult to use Shannon's information theory to measure the amount of  
59 information transmitted at a synapse because the experimenter needs to observe the  
60 symbols conveying the message while also observing or controlling the sensory  
61 input<sup>21,22</sup>. This has recently been achieved by multiphoton imaging of the glutamate  
62 reporter iGluSnFR<sup>23</sup> in bipolar cells of larval zebrafish, where it is found that the visual  
63 message transmitted from an active zone does not use a simple binary code but is  
64 instead composed of a number of symbols, composed of one, two, three or more  
65 vesicles released as one event<sup>17</sup>. Here we demonstrate that this strategy of coding by  
66 amplitude as well as rate is under diurnal control. Synaptic responses to temporal  
67 contrast reach a maximum in the afternoon and are accompanied by a four-fold  
68 increase in the Shannon information transmitted at each active zone compared to the  
69 morning. Dopamine contributes to this increase in information transfer by reducing  
70 several aspects of synaptic "noise" and by increasing the probability of multivesicular  
71 events with larger information content, which in turn increases the efficiency of  
72 transmission quantified as bits per vesicle.

73

74

## 75 **Results**

76

### 77 **Differential regulation of luminance-sensitivity and contrast-sensitivity**

78 To investigate the diurnal modulation of visual processing in larval zebrafish we began  
79 by imaging synaptic activity in bipolar cells with SyGCaMP2<sup>24</sup> (Fig. 1A). When  
80 animals were placed on a cycle of 14 hours light and 10 hours dark, no significant  
81 synaptic responses could be detected at *Zeitgeber* times 18-0 hours, consistent with  
82 previous observations that larvae are blind at subjective night<sup>25</sup>. Visual sensitivity  
83 began to recover within 20 mins of light onset, after which responses gradually

84 increased in amplitude (Fig. S1A and Fig. 1B). Plotting the irradiance-response  
 85 functions (Fig. 1C) allowed the luminance sensitivity to be quantified as the inverse of  
 86 the irradiance generating a half-maximal response ( $1/I_{1/2}$ ). Over the course of the day,  
 87 luminance-sensitivity increased gradually over a range greater than 200-fold (Fig. 1D).  
 88 As in other species, this increase could be explained largely by actions of D2  
 89 dopamine receptors because injection of the antagonist sulpiride ( $\sim 2 \mu\text{M}$ ) reduced  
 90 luminance-sensitivity in the afternoon to levels measured in the morning<sup>6</sup> (Fig. S1).

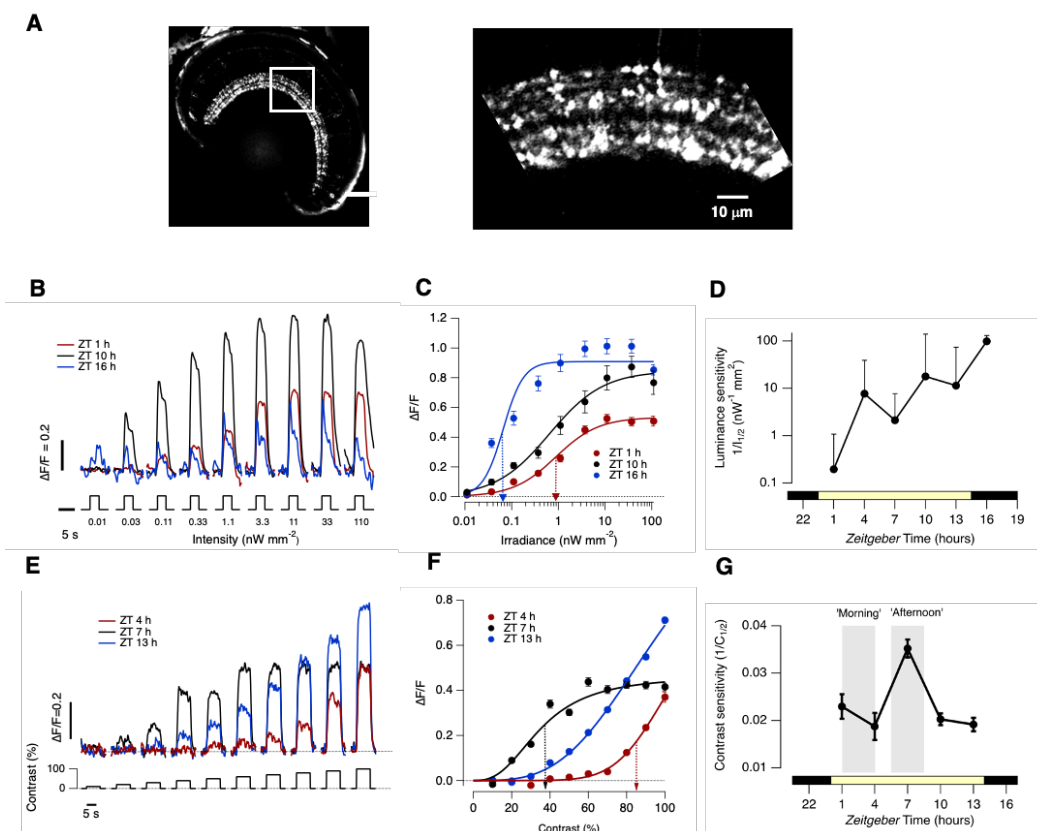

91

92 **Figure 1: Differential regulation of luminance-sensitivity and contrast-sensitivity**

93 **A.** Left: Retina of a Ribeye::SyGCaMP2 fish with box over the IPL. Right: expansion of the boxed region of  
 94 showing terminals of bipolar cells. **B.** Averaged responses from ON terminals to light steps of different  
 95 irradiance measured at *Zeitgeber* time 1, 10 and 16 hours. Note large variations in amplitude and  
 96 kinetics. Each light step was of 3 s ( $n = 535$  terminals from 10 fish). **C.** Peak response as a function of  
 97 irradiance for ON terminals in B. The smooth lines are Hill functions of the form  $R = R_{\max} \cdot (I^h / (I^h + I_{1/2}^h))$ ,  
 98 where  $R$  is the peak response,  $I$  is the irradiance,  $h$  is the Hill coefficient and  $I_{1/2}$  is the irradiance  
 99 generating the half-maximal response. At ZT = 16 hrs:  $R_{\max} = 0.91 \pm 0.04$ ;  $h = 2.0 \pm 0.2$ ;  $I_{1/2} = 0.066 \pm$   
 100  $0.02 \text{ nW/mm}^2$  (dashed blue arrow). At ZT = 10 hrs:  $R_{\max} = 0.85 \pm 0.06$ ;  $h = 0.8 \pm 0.1$ ;  $I_{1/2} = 0.65 \pm 0.18$   
 101  $\text{nW/mm}^2$ . At ZT = 1 hrs:  $R_{\max} = 0.853 \pm 0.02$ ;  $h = 0.9 \pm 0.2$ ;  $I_{1/2} = 0.88 \pm 0.18 \text{ nW/mm}^2$  (red arrow). **D.**  
 102 Variations in luminance sensitivity as a function of *Zeitgeber* time averaged across both ON and OFF

103 terminals (n=535 and 335, respectively). The lower bar shows the timing of the light-dark cycle. **E.**  
104 Averaged responses to stimuli of different contrasts measured at *Zeitgeber* time 4, 7 and 13 hrs. **F.** Peak  
105 response amplitude as a function of contrast for terminals shown in E. The smooth lines are Hill functions  
106 used to interpolate values of  $C_{1/2}$ , the contrast generating the half-maximal response. Note the diurnal  
107 variations. At ZT = 4 hrs:  $C_{1/2} = 86 \pm 2\%$  (dashed red arrow);  $h = 7.0 \pm 1.2$ . At ZT = 7 hrs:  $C_{1/2} = 35 \pm 2\%$   
108 (dashed black arrow);  $h = 2.7 \pm 0.2$ . At ZT = 13 hrs:  $C_{1/2} = 72 \pm 2\%$ ;  $h = 3.3 \pm 0.2$ . **G.** Variations in  
109 contrast-sensitivity as a function of *Zeitgeber* time averaged across ON and OFF terminals. Note the  
110 peak around ZT = 7 hours which is not mirrored in the diurnal variation in luminance sensitivity (D). The  
111 grey bars show the periods described as “morning” and “afternoon”. All error bars show  $\pm 1$  SD.  
112

113 The detection of modulations in light intensity (contrast) was also under diurnal  
114 control, but with a distinctive time-course (Fig. 1E-G; 5 Hz full-field stimuli). At ZT = 4  
115 hours, temporal contrasts below 50% were barely detected and the half-maximal  
116 response ( $C_{1/2}$ ) was generated by a contrast of  $86 \pm 2\%$  (Figs. 1E and F). But at ZT =  
117 7 hours  $C_{1/2}$  it fell to  $35 \pm 2\%$  with responses saturated above 50%. When contrast  
118 sensitivity ( $1/C_{1/2}$ ) was mapped during the course of the day it was relatively constant  
119 at ZT 1-5 hours and ZT 9-14 hours but increased to levels ~2.4-fold higher around ZT  
120 = 7 hours (Fig. 1G). Notably, this peak in the contrast sensitivity of the retinal circuit  
121 occurred at a similar *Zeitgeber* time as the maximum contrast sensitivity measured  
122 behaviourally using the optokinetic reflex<sup>8,26</sup>. A qualitatively similar increase in contrast  
123 sensitivity was also observed at the retinal output projecting to the optic tectum (Fig.  
124 S2).

### 125 126 **Diurnal regulation of contrast gain**

127 To measure transmission of the visual signal in terms of its elementary units –  
128 synaptic vesicles - we expressed the reporter iGluSnFR<sup>23</sup> sparsely in bipolar cells (Fig.  
129 2A). Wiener deconvolution of iGluSnFR signals allowed us to count released vesicles  
130 (see Methods and Fig. S3; detailed evidence that these methods allow signals to be  
131 isolated from individual active zones vesicles has been described<sup>17</sup>). Synaptic function  
132 was compared over a two-hour period beginning 1 hour after light onset (“morning”)  
133 with a two-hour period beginning 6 hours later (“afternoon”; Fig. 1G).

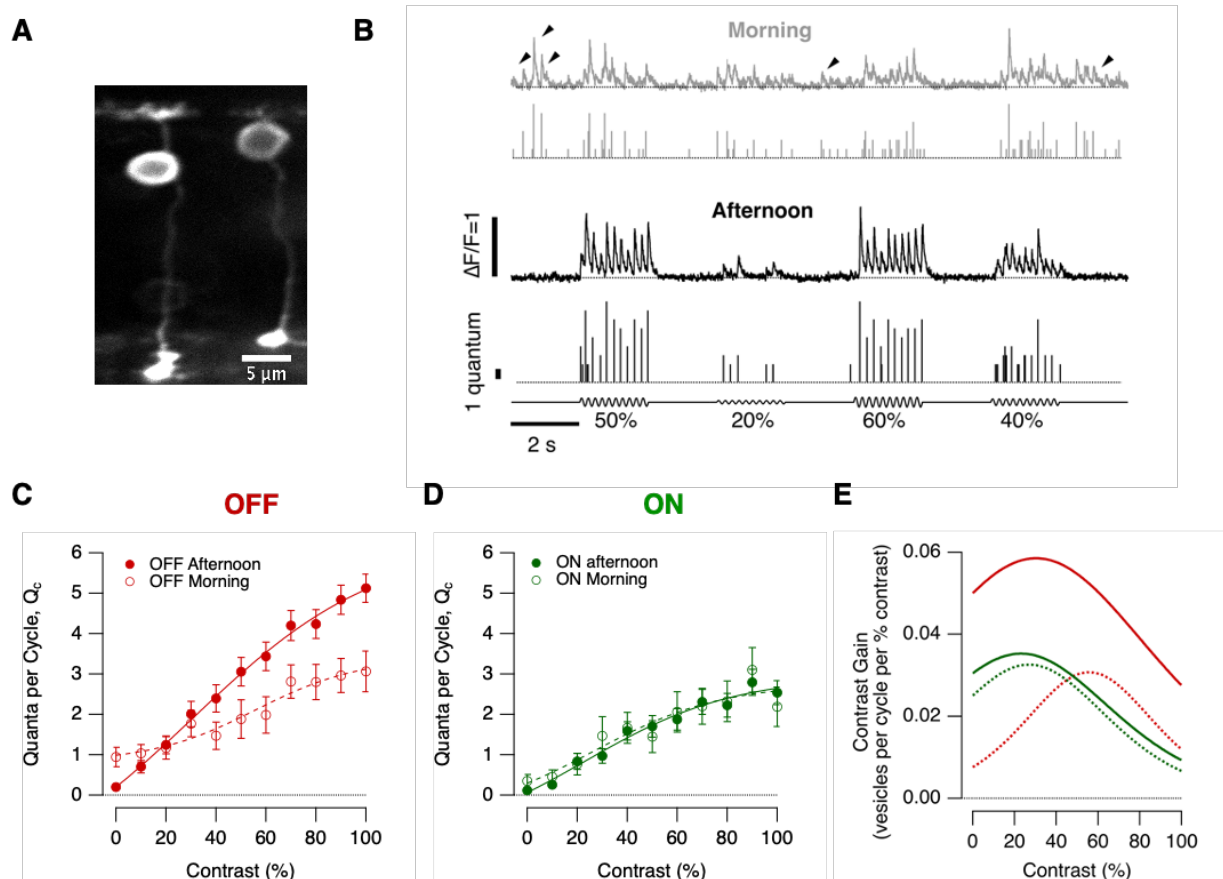

**Figure 2. Diurnal modulation of synaptic gain**

**A.** Multiphoton section through the eye of a zebrafish larva (7 dpf) expressing iGluSnFR in a subset of bipolar cells. **B.** Examples of iGluSnFR signals from an individual OFF synapse elicited using a stimulus of variable contrast modulated at 5 Hz (0-100%, full field, sine wave) in the morning (ZT 1-3 hours, grey) and afternoon (ZT 6-9 hours, black). Note the high levels of spontaneous activity in the morning (black arrowheads). In each case the top trace shows the iGluSnFR signal and the lower trace the estimated number of quanta composing each event ( $Q_e$ ). **C.** Average contrast-response functions in OFF bipolar cell synapses in the morning (open circles;  $n = 20$  synapses) and afternoon (closed;  $n = 59$ ), where the response ( $R$ ) was quantified as the average of quanta per cycle ( $Q_c$ ). The smooth lines are fits of a sigmoid used for smoothing. Note the differences in the shape of the contrast-response functions and in the levels of spontaneous activity (zero contrast). **D.** Average contrast-response functions in ON bipolar cell synapses in the morning (open circles;  $n = 12$  synapses) and afternoon (closed;  $n = 31$ ). There was no significant difference in in the morning relative to afternoon (Chi-square test,  $p = 0.9999$ ). **E.** The contrast gain calculated as the derivative of the fits to the contrast-response functions in C and D. Note that the maximum contrast discrimination is increased by a factor of 2x in the OFF channel during the afternoon.

134  
135  
136  
137  
138  
139  
140  
141  
142  
143  
144  
145  
146  
147  
148  
149  
150  
151  
152  
153  
154

155 Examples of glutamate transients at an individual OFF active zone are shown in  
156 Fig. 2B. Across a range of contrasts, responses were, on average, larger in the  
157 afternoon. We began by measuring the contrast-response function (CRF) simply as  
158 the average number of vesicles released per cycle of a 5 Hz stimulus, choosing this  
159 frequency because the integration time of a bipolar cell is  $\sim 200$  ms<sup>27</sup>. There was little  
160 diurnal modulation of the CRF measured at ON synapses but in the OFF channel the  
161 maximum rate of release measured at 100% contrast increased from  $15.25 \pm 2.5$   
162 vesicles/s in the morning to  $25.5 \pm 1.5$  vesicles/s in the afternoon (Fig. 2C and D).  
163 This increase in synaptic gain was accompanied by an increase in contrast sensitivity,  
164 and the combined effects were assessed as the derivative of the CRF (“contrast gain”;  
165 Fig. 2E). Contrasts in natural visual scenes rarely exceed 40%<sup>12</sup> and in the morning  
166 this range was signalled best through the ON channel. But in the afternoon the OFF  
167 channel became dominant, with contrast gains increasing by factors of 2-6.

168

### 169 **Dopamine regulates contrast gain**

170 To test whether dopamine contributes to diurnal changes in contrast sensitivity we  
171 injected agonists or antagonists of dopamine receptors directly into the eye. Fig. 3A  
172 shows examples of the output from a synapse imaged in the afternoon, before and  
173 after injection of the D1 receptor antagonist SCH 23390 (estimated final concentration  
174 of  $0.1 \mu\text{M}$ ). Counteracting the actions of endogenous dopamine reduced the average  
175 rate of vesicle release and shifted the CRF such that the maximum contrast gain was  
176 achieved at higher contrasts (black points in Fig. 3B and C). Conversely, increasing  
177 activation of D1 receptors in the morning by injection of the agonist ADTN ( $\sim 0.2 \mu\text{M}$ )  
178 increased response gain.

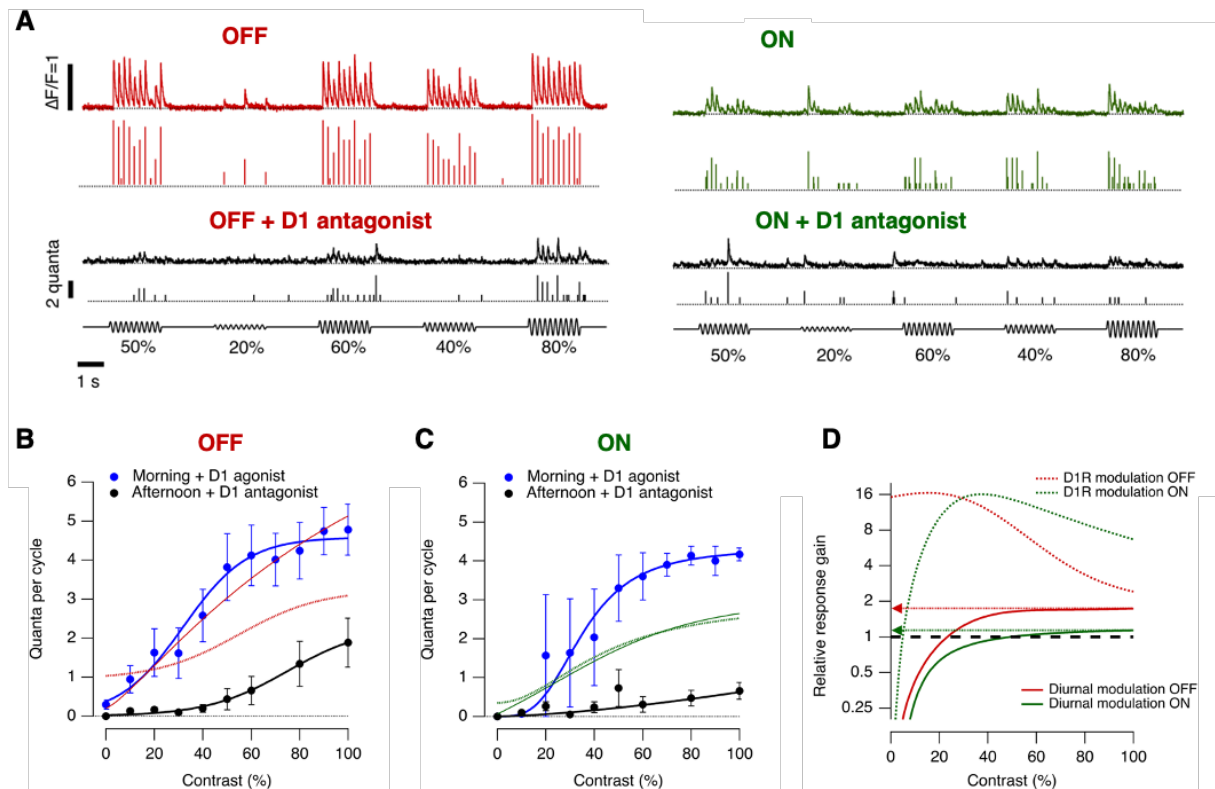

179

180

**Figure 3. Diurnal changes in dopamine levels modulate synaptic transmission.**

181

182

183

184

185

186

187

188

189

190

191

192

193

194

195

196

197

198

199

200

**A.** Examples of iGluSnFR signals recorded in the afternoon from an individual OFF (red trace) and ON (green trace) synapses elicited using a stimulus of variable contrast before and after intravitreal injection of the D1 antagonist, SCH 23390 (black traces; 5 Hz modulation). Note that SCH 23390 abolished synaptic responses at lower contrasts in ON and OFF synapses. In each case the top trace shows the iGluSnFR signal and the lower trace the estimated  $Q_e$ . **B.** Average contrast-response functions in OFF bipolar cell synapses after administration of D1 antagonist (black dots) in the afternoon and after administration of the D1 agonist ADTN in the morning (blue dots). Each point shows the mean  $\pm$  s.e.m. (SCH 23390,  $n=12$  synapses; ADTN,  $n=12$  synapses). Control responses observed in the morning and afternoon are superimposed in the graph (red lines, see Fig. 2C). **C.** Average contrast-response functions in ON bipolar cell synapses in three conditions: afternoon (green dots), after intravitreal injection of D1 antagonist in the afternoon (black dots) and ADTN in the morning (blue dots). Each point shows the mean  $\pm$  s.e.m. (SCH 23390,  $n=7$  synapses; ADTN,  $n=5$  synapses). Control responses observed in the morning and afternoon are superimposed to the graph (green lines, see Fig. 2D). **D.** Relative response gain by diurnal modulation and after manipulation of dopaminergic signalling (dashed lines). Note that diurnal modulation of synaptic gain is higher in OFF synapses, whereas dopamine modulates the dynamic range by  $\sim 16$  fold-change in ON and OFF synapses.

The dynamic range over which D1 receptors adjusted synaptic gain was calculated as the ratio of the CRFs in the presence of the agonist and antagonist: in both ON and OFF channels the maximum modulation was  $\sim 16$ -fold, occurring at



201 contrasts of 20-40% (Fig. 3D). But diurnal modulation of gain was narrower than this  
202 potential range: 1.7-fold in OFF synapses and 1.1-fold in ON. This difference  
203 reflected, at least in part, a gain in the morning that was at least 5-fold higher than that  
204 measured with D1R receptors blocked, consistent with dopamine levels that were  
205 already high enough to potentiate synaptic transmission (Fig. 3B and C). These  
206 manipulations of retinal dopamine receptors caused qualitatively similar changes in the  
207 signals that ganglion cells transmit to the optic tectum (Fig. S2).

208

### 209 **Modulation of synaptic noise and variability**

210 How does diurnal modulation of contrast processing affect the information transmitted  
211 to ganglion cells? In the framework of information theory<sup>21</sup>, an increase in synaptic  
212 gain will tend to reduce uncertainty (and therefore increase information) by causing a  
213 larger change in the number of vesicles released when contrast changes. But  
214 information is degraded by “noise” that causes responses to vary when the same  
215 stimulus is repeated and synapses are a major source of such variability within neural  
216 circuits<sup>28,29</sup>. One cause of synaptic noise is the stochasticity of the presynaptic  
217 processes that control the fusion of vesicles<sup>18</sup> and this was a prominent feature of the  
218 output from synapses of bipolar cells (Figs. 2B). We distinguished four aspects of  
219 synaptic variability and investigated the diurnal modulation of each; i) spontaneous  
220 vesicle release (Fig. 4), ii) variability in the number of vesicles released by a stimulus  
221 (Fig. 5), iii) variability in the timing of release events i.e how tightly they are time-locked  
222 to the stimulus (Fig. 6) and iv) modulation of multivesicular release (Fig. 7). Finally, we  
223 calculated how these different aspects of synaptic “noise” combined with changes in  
224 contrast gain (Fig. 3) to alter the amount of visual information transferred from  
225 individual active zones (Fig. 8).

226

227

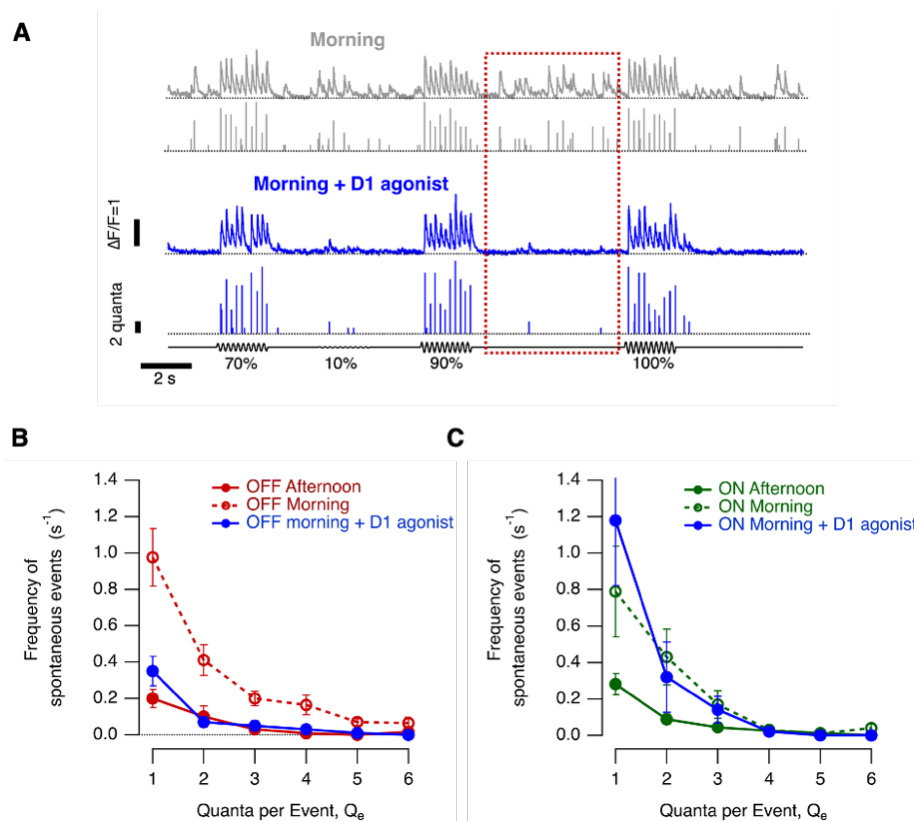

228

229

#### Figure 4. Diurnal modulation of spontaneous synaptic noise

230

231

232

233

234

235

236

237

238

239

240

241

242

243

244

#### *i) Spontaneous release*

245

246

247

Increases in synaptic gain were accompanied by a *decrease* in the spontaneous release of vesicles in the absence of a visual stimulus. In the morning, spontaneous release occurred at relatively high rates (Fig. 4A) composed of both univesicular and

248 multivesicular events (Fig. 4B and C). Integrating across events of all amplitudes, the  
249 average rate of spontaneous release in OFF synapses was  $22.5 \pm 12.5$  vesicles  $s^{-1}$  in  
250 the morning, falling to  $5 \pm 1$  vesicles  $s^{-1}$  in the afternoon (Fig. 4B). In ON synapses  
251 these values were  $9 \pm 4$  vesicles  $s^{-1}$  and  $2.5 \pm 1$  vesicles  $s^{-1}$  (Fig. 4C). In both channels,  
252 therefore, spontaneous noise was  $\sim 4$  times lower in the afternoon compared to the  
253 morning. Increased activation of D1 receptors suppressed spontaneous release in the  
254 morning to levels close to those measured in the afternoon, but only in OFF synapses  
255 (Fig. 4B and C).

256

257 ***ii) Variability in stimulus-evoked responses.***

258 When recording neural responses as spikes, the Fano factor is measured as the ratio of  
259 the variance-to-mean of spikes counted in a fixed time-window after a repeated  
260 stimulus<sup>30,31</sup>. We calculated the Fano factor of a synapse by counting the number of  
261 vesicles released over each cycle of a sinusoidal stimulus (Fig. 5A). In the morning, F  
262 was  $\sim 2.6$  in both ON and OFF synapses when averaged over a range of contrasts, falling  
263 to  $\sim 1.6$  in the afternoon (both significant at  $p < 0.002$ , KS test; Fig. 5B-C). The increase  
264 in contrast gain and sensitivity in the afternoon (Fig. 2C-D) was therefore also associated  
265 with increased reliability of bipolar cell synapses. Notably, the variability of synaptic output  
266 was higher than expected for a Poisson process, for which the Fano factor is one. The  
267 spike responses of post-synaptic RGCs are less variable, with a Fano factor as low as 0.3  
268 at higher contrasts<sup>30</sup>, likely reflecting the integration of signals from multiple synaptic  
269 inputs. Activation of D1 receptors in the morning improved the reliability of synaptic  
270 responses to levels similar to those measured in the afternoon (Figs. 5D and E).

271

272

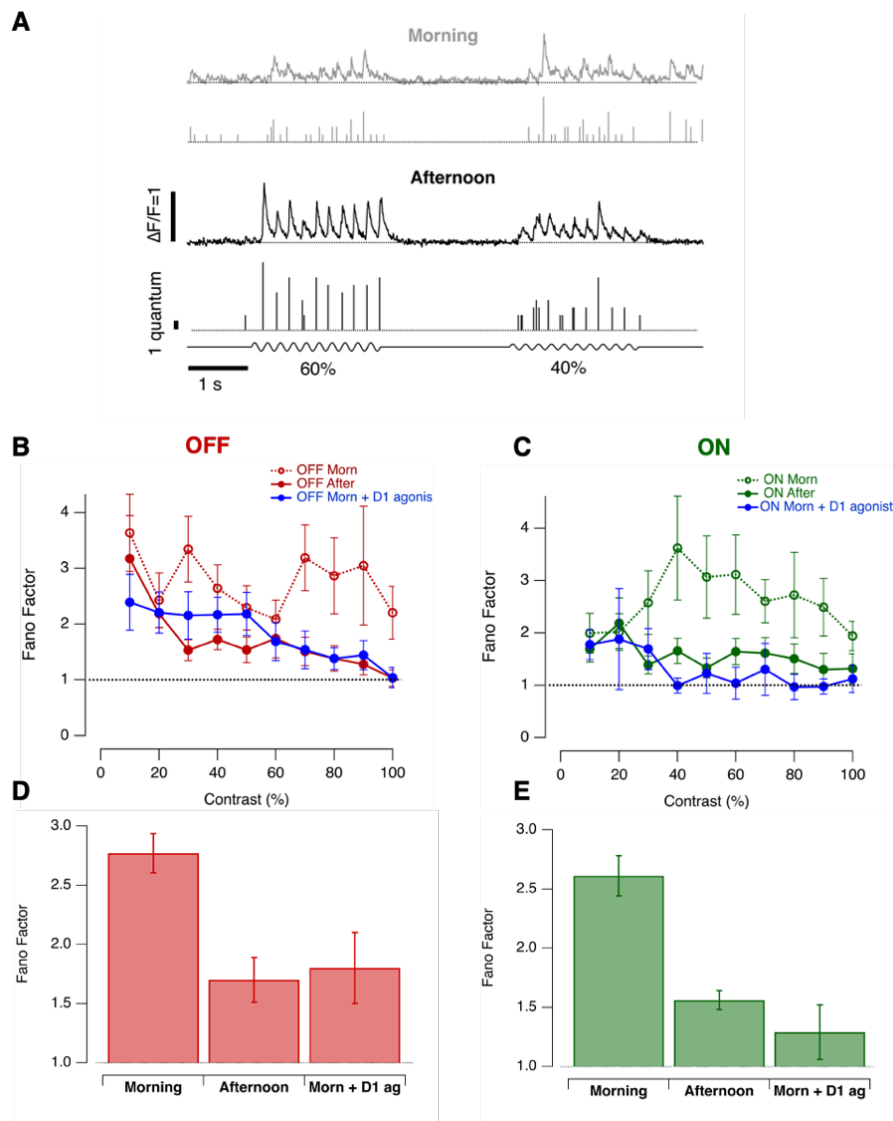

273

274

275

276

277

278

279

280

281

282

283

284

285

**Figure 5. Diurnal changes in the variability of stimulus-evoked responses**

**A.** Examples of iGluSnFR signals from individual OFF synapses in the morning and afternoon. Responses elicited by stimuli of 60% and 40% contrast varied from cycle to cycle of the 5 Hz stimulus. In each case the top trace shows the iGluSnFR signal and the lower trace the estimated  $Q_e$ . **B.** Variability in the response of OFF synapses calculated as the Fano factor, where each response was quantified as the total number of vesicles released over one cycle at the contrasts shown. Comparison is made between the morning (n=18), afternoon (n=27) and the morning after injection of ADTN (n=13). **C.** As in B, but for ON synapses (n = 12, 15 and 6 synapses for respective conditions). **D.** Average Fano factor over different contrasts in OFF synapses in the three conditions described above. Overall, the average fano factor was significantly higher in the morning compared to afternoon or in the morning after injection of ADTN (t-test;  $p < 0.0001$ ). **E.** As D, but for ON synapses. Again, the average Fano factor was significantly higher in the morning (t-test;  $p < 0.001$ ).

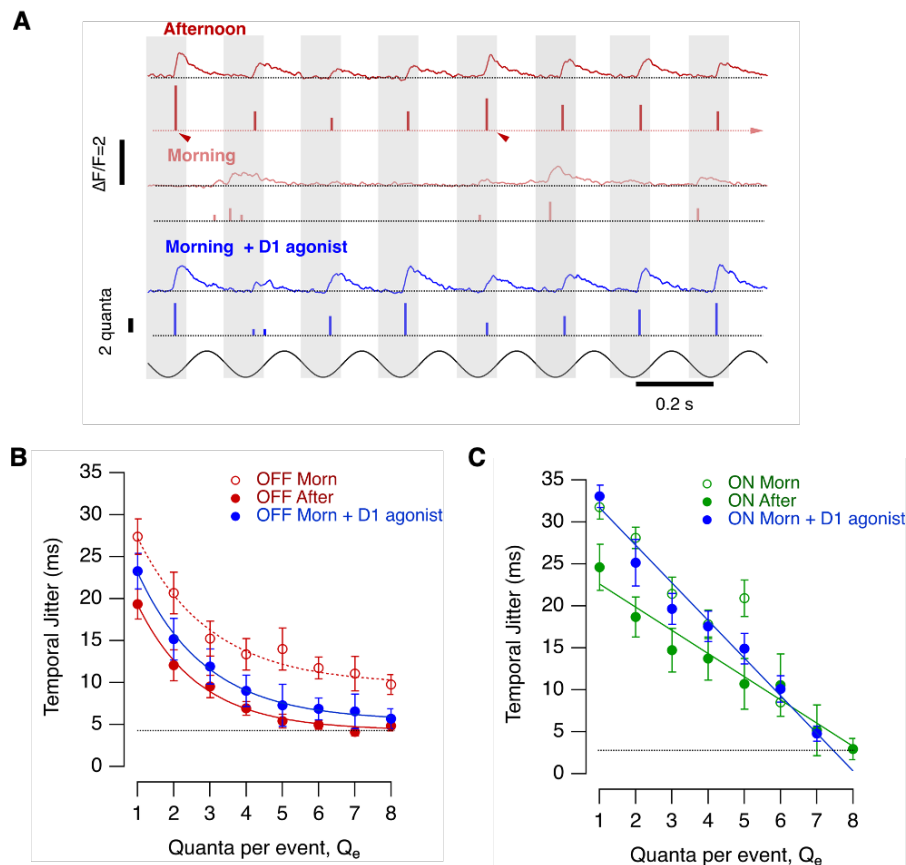

286

287

**Figure 6. The temporal precision of MVR is under diurnal control in the OFF channel**

288

289

290

291

292

293

294

295

296

297

298

299

300

301

302

303

304

305

306

307

308

**A.** Example recordings from two OFF synapses stimulated at 60% contrast in three conditions: afternoon (top, black trace), morning (middle, red trace) and after intravitreal injection of ADTN in the morning (bottom, blue trace). Morning and morning + ADTN synaptic responses are from the same synapse. The modulation in intensity (5 Hz, sine wave) is shown below. Arrowheads highlight events occurring at different phases of the stimulus, with less variation with events composed for 4 or more quanta in the afternoon and after administration of ADTN in the morning. In each case the top trace shows the iGluSnFR signal and the lower trace the estimated  $Q_e$ .

**B.** Temporal jitter of events composed of different numbers of quanta in OFF synapses in the afternoon (red dots ;  $n = 24$  synapses); Morning (open red dots;  $n = 19$  synapses) and Morning + ADTN (blue dots,  $n = 16$ ). Note that during the morning events composed by multiple quanta were less phase-locked to the stimuli in comparison to the afternoon. Activation of D1 receptors had a significant effect on release of multiquantal events. Events composed by 5 or more quanta jittered by  $\sim 7$  ms, similar to values observed in the afternoon. The solid lines describing these relations in the three conditions are better described by a single exponential decay function of the form  $y_0 + A_{\text{exp}}(-((x-x_0)/\tau))$  with  $y_0 = 4.23 \pm 1.2$  and  $A = 27 \pm 7$  in the afternoon;  $y_0 = 9.77 \pm 1.4$  and  $A = 28.64 \pm 5.6$  in the morning and  $y_0 = 5.45 \pm 1.3$ ,  $A = 30. \pm 6.1$  after activation of D1 receptor in the morning.

**C.** Temporal jitter of events composed by different numbers of quanta measured in ON synapses in the afternoon (green dots;  $n = 14$  synapses) during the (open green dots;  $n = 10$  synapses) and during Morning + ADTN, (blue dots;  $n = 6$  synapses). Activation of D1 receptor did not have a significant effect in the temporal precision in the ON channel. The relationship observed in the morning is better described by a straight line with  $a = 34.7 \pm 1.5$  and a slope =  $-3.6 \pm 0.5$ .

309 ***iii) Temporal jitter.***

310 Retinal ganglion cells (RGCs) encode information not just in their spike count but also  
311 in the timing of spikes<sup>30,32</sup>. Spike times can vary by just a few milliseconds and this  
312 accuracy depends on the precision of excitatory inputs received from bipolar cells<sup>33</sup>.  
313 The standard deviation in timing of release events (“temporal jitter”) was measured  
314 relative to the phase of a 5 Hz stimulus (60% contrast; Fig. 6A) and the larger the  
315 release events the more precise it was on average (Fig. 6B-C). In OFF synapses the  
316 temporal jitter was 5-8 ms higher in the morning compared to the afternoon for events  
317 composed of up to 8 vesicles (Fig. 6B;  $p < 0.008$ , Kolomogorov-Smirnov test). Diurnal  
318 modulation of temporal precision was weaker in ON synapses and only significant for  
319 events composed of 1-3 vesicles (Fig. 3H; t-test at each  $Q_e$ ). Increasing activation of  
320 D1 receptors in the morning reduced temporal jitter in events composed for multiple  
321 quanta in OFF synapses ( $p < 0.05$ ; KS test) but not ON (Fig. 6B and C;  $p > 0.5$ ).  
322 Diurnal variations in dopamine therefore modulate the temporal accuracy of vesicle  
323 release.

324

325 ***iv) Changes in the distribution of multivesicular events***

326 Previous studies quantifying the synaptic transfer of visual information have been  
327 limited by the inability to monitor individual active zones and used the assumption that  
328 vesicles are released according to Poisson statistics<sup>34,35</sup>. But we now know that bipolar  
329 cells do not employ a simple rate-code and visual information is also contained in the  
330 *amplitude* of multivesicular events<sup>17</sup>. We therefore tested whether modulation of  
331 contrast gain was accompanied by changes in  $Q_e$ , the number of quanta in an event.

332 A comparison of the distribution of  $Q_e$  in the morning and afternoon is shown in  
333 Fig. 7 for responses to a stimulus of 60% contrast. In ON synapses, 68% of release  
334 events in the morning were univesicular, falling to 40% in the afternoon and reflecting  
335 a shift in the distribution towards larger events (Fig. 7B;  $p < 0.05$ , KS test). This shift  
336 towards MVR was fully reversed by antagonizing D1 receptors by injection of SCH

337 23390 (Fig. 7C). In the morning, MVR was more prevalent in OFF synapses with only  
338 38% of release events being univesicular but again there was a significant shift  
339 towards larger events in the afternoon (Fig. 7D;  $p < 0.02$ ). Blocking the D1 actions of  
340 endogenous dopamine had a stronger effect in OFF synapses, increasing the  
341 proportion of univesicular events to 66% in the afternoon (Fig. 7E;  $p < 0.001$ ).  
342 Qualitatively similar modulation of MVR was observed over a range of contrasts from  
343 20% to 80% and blocking D1 receptors in the afternoon shifted the distribution back to  
344 univesicular release in both ON and OFF channels (Fig. 7D and E). Diurnal variations  
345 in dopamine therefore modulate MVR.

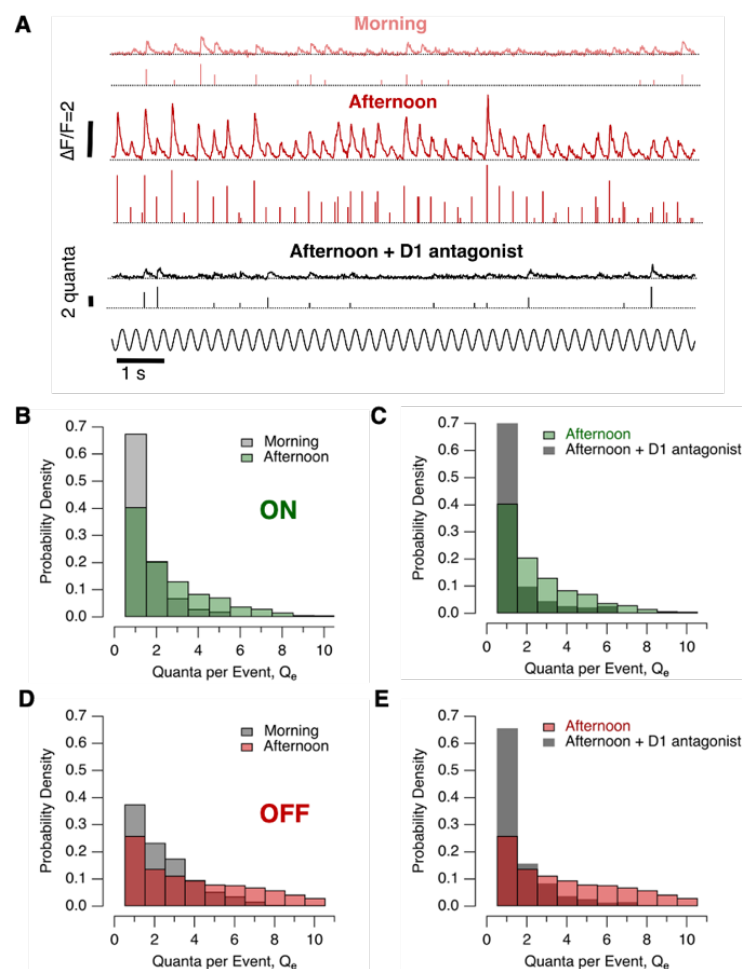

346

347 **Figure 7. Dopamine contributes to diurnal variations in the distribution of multivesicular events**

348 A. Examples of iGluSnFR signals from individual synapses elicited using 60% contrast stimulus (5 Hz,  
349 30 sec) in the morning (top), afternoon (middle) and afternoon + SCH 23390 (bottom). In each case the top  
350 trace shows the iGluSnFR signal and the lower trace the estimated  $Q_e$ . B. Changes in  $Q_e$  in ON synapses  
351 in the morning and afternoon. In the afternoon the distribution was shifted toward multiquantal events

352 (p<0.059, Chi-squared test). **C.** Changes in the distribution of  $Q_e$  in ON synapses before and after  
353 intravitreal injection of the D1 antagonist SCH23390. The distribution was shifted toward lower  $Q_e$   
354 (p<0.001) but was not significantly different to that measured in the morning. **D.** Changes in  $Q_e$  in OFF  
355 synapses in the morning and afternoon. In the afternoon the distribution was shifted toward multiquantal  
356 events (p<0.007). **E.** Changes in the distribution of  $Q_e$  in OFF synapses before and after intravitreal  
357 injection of SCH 23390 in the afternoon. The distribution was shifted toward uniquantal events (p<0.001).

358

### 359 **Modulation of information encoded at the synapse**

360 How do changes in synaptic gain (Figs. 2-3), noise (Fig. 4-6) and MVR (Fig. 7)  
361 combine to alter the amount of visual information transmitted by the synapses of  
362 bipolar cells? A larger synaptic signal relative to noise (SNR) will tend to increase the  
363 mutual information (I) between the response (q) and the stimulus generating it (S),  
364 although the size of the increase will depend on the statistical properties of both signal  
365 and noise<sup>36</sup>. In the simple situation where both have a Gaussian distribution  $I =$   
366  $0.5\log_2(1+SNR)$ . But how should we quantify the synaptic signal? When analyzing the  
367 spike code, all events comprise the same symbol and the response can be described  
368 as the number of spikes in each of a series of time bins<sup>22,36</sup>. The output from bipolar  
369 cells is qualitatively different with a visual stimulus being encoded both by the timing of  
370 release events and their amplitudes<sup>17</sup>. We therefore took an approach in which MVR  
371 composed of different numbers of vesicles were considered different symbols<sup>21,37</sup>. The  
372 mutual information between the response and stimulus was then computed as the  
373 average amount of information about the stimulus gained from observing any symbol  
374 (see Methods).

375 The stimulus set S comprised 12 different contrasts but these were not fixed for  
376 each synapse because the contrast sensitivity varied between synapses and between  
377 morning and afternoon (Fig. 1E-G). To make allowance for this, we used contrasts  
378 spanning  $\pm 10\%$  around  $C_{1/2}$  measured within the synapse under study immediately  
379 before delivering the stimulus set. In the absence of information about the distribution  
380 of contrasts normally experienced by a larval zebrafish, a uniform distribution of



381 contrasts was used for S. Each contrast step lasted 2 s (5 Hz) and they were presented  
 382 in two different pseudo-random orders, of which one is shown in Fig. 8A.

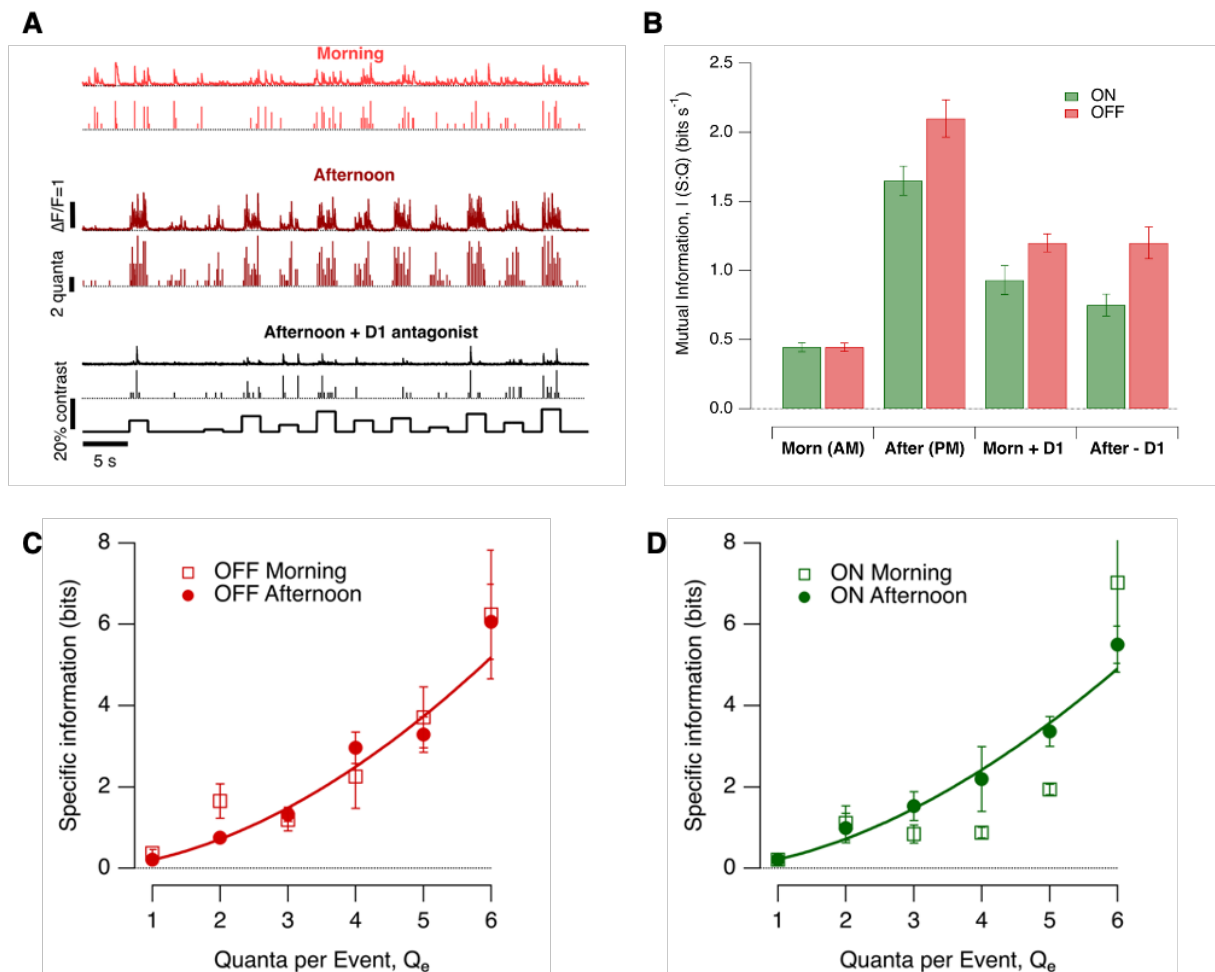

383

384 **Figure 8. Diurnal changes in the efficiency with which synapses transmit visual information**

385 **A.** Examples of synaptic responses over 12 different contrasts spanning  $\pm 10\%$  around the contrast  
 386 eliciting the half-maximal response ( $C_{1/2}$ ) in the morning (top, light red), afternoon (middle, dark red) and  
 387 after injection of D1 antagonist SCH 23390 in the afternoon (bottom, black; note the lower frequency and  
 388 amplitude of release events). In each case the top trace shows the iGluSnFR signal and the lower trace  
 389 the estimated  $Q_e$ . Each contrast step lasted 2 s (5 Hz) and each trace is from a different OFF synapse. **B.**  
 390 Mutual information  $I_1(S;Q)$  in four conditions: (i) morning, (ii) afternoon, (iii) morning after injection of ADTN,  
 391 (iv) afternoon after injection of SCH 23390. **C.** Specific information ( $I_2$ ) for events of different quantal  
 392 content in OFF synapses (33 synapses). The curve describing the relation is a least-squares fit of a power  
 393 function of the form  $i = A Q_e^x$ , with  $A = 0.20$ , and  $x = 1.81$ . **D.** As C, but for ON synapses ( $n = 13$ ). The  
 394 curve describing the relation is almost identical ( $A = 0.21$ , and  $x = 1.75$ ).  
 395

396 In the morning, the average mutual information between stimulus and response  
397 was almost exactly the same for synapses in the ON and OFF channels ( $0.445 \pm$   
398  $0.035$  bits  $s^{-1}$  and  $0.455 \pm 0.03$  bits  $s^{-1}$ , respectively). In the afternoon mutual  
399 information increased through both channels although the increase in OFF synapses  
400 (370%) was significantly larger than in ON (270%;  $p < 0.001$ ; Fig. 8B). In OFF  
401 synapses, the maximum mutual information of  $2.1$  bits  $s^{-1}$  was associated with average  
402 release rate of  $2.5$  vesicles  $s^{-1}$  around  $C_{1/2}$ , equivalent to an efficiency around  $0.8$  bits  
403 per vesicle.

404 Several of the synaptic properties we have analyzed will contribute to the  
405 improvement in information transmission in the afternoon, including the increase in  
406 synaptic gain (Fig. 2), the decrease in spontaneous noise (Fig. 3) and reduced  
407 variability of stimulus-evoked responses (Figs. 5 and 6). These aspects of synaptic  
408 transmission were all subject to modulation by dopamine and, consistent with these  
409 changes, mutual information in the morning was increased by activation of D1  
410 receptors while in the afternoon it was decreased by antagonizing the effects of  
411 endogenous dopamine (Fig. 8B).

412 These results demonstrate that information transmission through the retina is  
413 under diurnal control and that dopamine is a key neuromodulator controlling these  
414 changes. Antagonizing D1 receptors did not, however, reduce mutual information to  
415 levels measured in the morning, leaving open the possibility that other signaling  
416 pathways also contribute.

417

### 418 **Changes in the efficiency of the vesicle code**

419 The transmission of information using spikes and vesicles is the major consumer of  
420 energy in the brain with one estimate being of the order of  $\sim 24,000$  ATP molecules per  
421 bit<sup>38,39</sup>. The largest part of this energy consumption is taken up by synaptic  
422 transmission so a key question becomes the effect of neuromodulation on the  
423 efficiency with which vesicles are used to transmit information. Strikingly, the 2.7-fold

424 increase in information transmitted through ON synapses in the afternoon (Fig. 8B)  
425 was *not* associated with any change in the average rate of vesicle release (Fig. 2D and  
426 E), while the 3.7-fold increase in OFF synapses was associated with only a 2-fold  
427 increase in the rate around  $C_{1/2}$  (Fig. 2C and E). The diurnal increase in synaptic gain  
428 was therefore associated with a 1.4- to 2.7-fold increase in the average efficiency with  
429 which vesicles were used to encode changes in contrast. A comparison can be made  
430 with the information transmitted by spikes in RGCs, where the most sluggish cells  
431 transmit  $\sim 3.5$  bits/spike, while those that fire most briskly encode  $\sim 2$  bits/spike<sup>40</sup>. An  
432 increase in spike rate is therefore associated with a *decrease* in the visual information  
433 per spike while an increase in vesicle release rate is associated with an *increase* in  
434 information per vesicle.

435 How is this increase in the efficiency of the vesicle code achieved? The  
436 comparison of information transmission with average rates of vesicle release obscures  
437 a key aspect of the vesicle code operating in bipolar cells: information about contrast is  
438 represented as changes in both the rate and amplitude of release events<sup>23</sup>. This is  
439 significant because the distribution of MVR events was also a function of *Zeitgeber*  
440 time and larger events are rarer and carry more specific information<sup>17</sup>, as shown by the  
441 supralinear relation between the specific information carried by each synaptic symbol  
442 and the number of vesicles it contains (Fig. 8C-D). The diurnal modulation of the  
443 efficiency of the vesicle code therefore depends on the shift between univesicular and  
444 multivesicular release (Fig. 7B and D).

445 We also considered the possibility that modulation of retinal processing might be  
446 accompanied by changes in the amount of information carried by a given synaptic  
447 symbol. The relation between information carried and event amplitude did not,  
448 however, change in the afternoon compared to the morning, at least for events  
449 composed of 1-6 vesicles (Fig. 8C-D; OFF synapses  $p > 0.99$ ; ON synapses  $p > 0.98$ ; KS  
450 test).

451

452 **Discussion**

453 The plasticity of synapses allows the flow of information through circuits to be  
454 modulated<sup>1</sup> and this study provides a quantitative understanding of this idea in the  
455 context of the diurnal control of visual processing in the retina. We find that the daily  
456 light-dark cycle alters the transmission of visual information through bipolar cells by  
457 factors of ~4 during daylight hours by adjusting four synaptic properties; the number of  
458 vesicles released by a stimulus (Fig. 3), spontaneous synaptic noise (Fig. 4), the  
459 variability of stimulus-driven responses (Figs. 5-6) and the balance between  
460 univesicular and multivesicular release (Fig. 7). Crucially, the switch in emphasis from  
461 univesicular to multivesicular release also increases the amount of information  
462 transmitted per vesicle (Fig. 8). Dopamine plays a major role in regulating all these  
463 aspects of retinal function although the relative contributions of these mechanisms  
464 differed between ON and OFF pathways.

465

466 **Diurnal modulation of gain**

467 Dopamine-dependent changes in the synaptic gain of bipolar cells might be caused  
468 either by direct modulation of processes within the terminal compartment or by actions  
469 on the circuitry in which they are embedded. A direct action is strongly supported by  
470 the presence of dopamine receptors (especially D1) on the terminal compartment of  
471 bipolar cells<sup>41,42</sup> and electrophysiological experiments demonstrating that their  
472 activation potentiates L-type calcium channels that control vesicle fusion<sup>4</sup>. Dopamine  
473 also acts on D2 receptors on cone synapses to potentiate the visual drive to bipolar  
474 cells but this mechanism alone does not easily explain the *transient* increase in  
475 contrast-sensitivity in the afternoon given that luminance sensitivity, a much more  
476 direct reflection of the strength of cone input, gradually increases throughout the day  
477 (cf. Fig. 1B and Fig. 1E). The gain of bipolar cell synapses is also strongly dependent  
478 on the inhibitory inputs that the synaptic compartments receives from amacrine cells  
479 and the possibility of diurnal modulation of inhibition remains open.

480 Dopamine release is controlled by the internal circadian clock as well as changes  
481 in luminance<sup>7</sup> or the appearance of food-related odours<sup>4</sup>. But other neuromodulators,  
482 are also released from amacrine cells, including melatonin<sup>43</sup>, Substance P<sup>44</sup> and  
483 somatostatin<sup>45</sup> and some of these can antagonize the actions of others<sup>44</sup>. A large  
484 number of different proteins control the activity of the retinal circuit and 17% of genes  
485 in zebrafish are under circadian regulation<sup>7</sup>. There is therefore a good possibility that  
486 neuromodulators other than dopamine will also act on the synaptic output of bipolar  
487 cells, either directly or indirectly, to regulate the visual signal transmitted to ganglion  
488 cells.

#### 489 **Diurnal modulation of noise**

491 It has long been appreciated that synaptic noise can reduce the amount of information  
492 transmitted through a circuit of neurons<sup>28</sup>. When the retina operates under photopic  
493 conditions, for instance, the release of vesicles from bipolar cells adds noise to the  
494 signal arriving from cones and therefore causes a loss of information in RGCs<sup>46</sup>. It has  
495 been suggested, however, that under other circumstances the noise in synaptic  
496 transmission might improve information transmission, such as when stochastic  
497 resonance increases the probability of post-synaptic depolarization crossing threshold  
498 for spike generation<sup>29,47</sup>. But it seems unlikely that the retina operates under such a  
499 regime, given that diurnal increases in synaptic gain went hand-in-hand with a  
500 reduction in several sources of noise, including spontaneous release unrelated to a  
501 stimulus.

502 All the changes in synaptic function that we observed comparing periods in the  
503 morning and afternoon were mimicked by manipulating dopamine signalling, indicating  
504 that this neuromodulator adjusts information transmission by orchestrating changes in  
505 both the signal and the various noise sources that cause it to vary. The balance  
506 between modulation of signal and noise was however, strikingly different in the ON  
507 channel, where synaptic gain was *not* under diurnal modulation, compared to the OFF

508 channel, where both signal and noise were regulated. The processes by which  
509 dopamine and other neuromodulators adjust synaptic noise are also likely to involve  
510 both direct actions on the synaptic compartment and indirect actions on other  
511 components of the retinal circuit.

512

### 513 **Modulation of multivesicular release**

514 MVR is not just a property of ribbon synapses but is also a feature of synaptic  
515 transmission in the hippocampus<sup>48</sup>, cerebellum<sup>49</sup> and somatosensory cortex<sup>19</sup>, where  
516 arrival of a spike can often trigger release of two or more vesicles at an active zone. A  
517 recent combination of electrophysiology with correlative light-and electron-microscopy  
518 has even led to the suggestion that MVR may be a fundamental mode of synaptic  
519 transmission throughout the nervous system<sup>20</sup>. It is also recognized that MVR can be  
520 adjusted by neuromodulation, for instance through muscarinic acetylcholine receptors  
521 in the striatum{Higley, 2009 #221} or GABA<sub>B</sub> receptors in the cortex{Chalifoux, 2010  
522 #222}, although the implications for information transmission in these contexts is not  
523 known. Our study has demonstrated that potentiation of MVR in the retina not only  
524 increases the amount of information that a synapse can transmit using vesicles but  
525 also the efficiency of coding. It will be interesting to establish how far neuromodulators  
526 acting in other parts of the brain alter the efficiency of the information transmission and  
527 how far this involves modulation of MVR as compared to the variability and noise that  
528 is a feature of central synapses<sup>28,29</sup>. A crucial aspect of these questions will be to  
529 understand how switching from univesicular release to multivesicular release alters the  
530 spike code generated post-synaptically.

531

532

533

534 **Acknowledgements**

535 The authors express many thanks to all the members of Lagnado laboratory for  
536 discussion. We also thank Tom Baden for his many insightful criticisms and suggestions.

537 This work was supported by grants to L.L. from the Wellcome Trust (102905/Z/13/Z).

538

539 **Author contributions**

540 J. M-D. conceived, designed and executed experiments, analyzed results and prepared  
541 the manuscript. B. J. carried out analysis and wrote code. F. E. conceived and executed  
542 experiments and carried out analysis. J. J. conceived and executed experiments and  
543 carried out analysis. L. L. conceived the project, designed experiments, analyzed data,  
544 repaired equipment, wrote code and prepared the manuscript.

545

546

547  
548  
549

## Supplementary Information

### Supplementary Figure 1

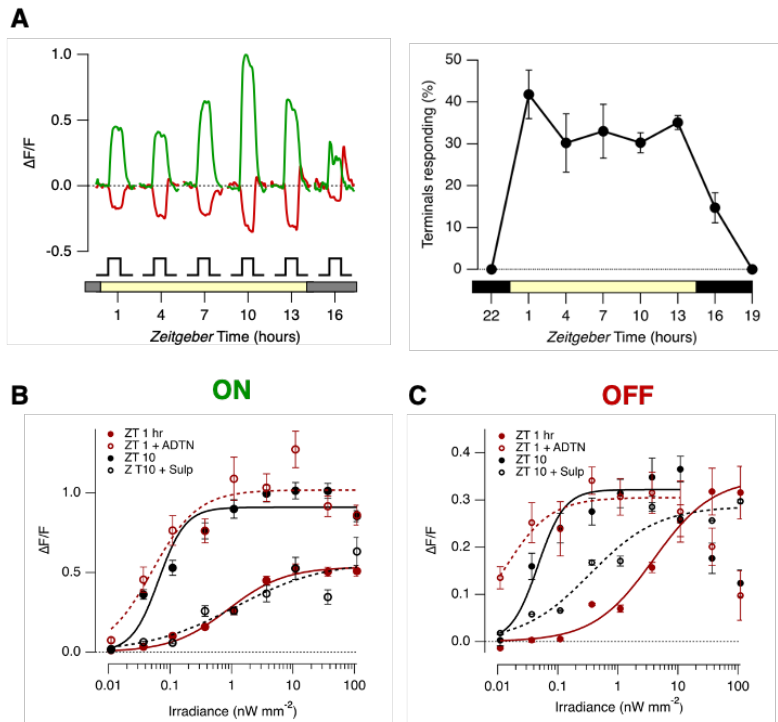

550  
551  
552  
553  
554  
555  
556  
557  
558  
559  
560  
561  
562  
563  
564  
565  
566  
567  
568  
569  
570  
571

#### Figure S1. Diurnal changes in luminance sensitivity are co-ordinated by dopamine

**A.** Left: Averaged SyGAMP2 signals at different *Zeitgeber* time. ON terminals green and OFF terminals red. Each step of light ( $10\ nW\ mm^{-2}$ ) lasted 3 s. These averages are only from responsive terminals. Right: the percentage of terminals generating a significant response to the same light step (averaged across both ON and OFF). Bars show SD. **B.** Effects of manipulating dopamine signalling on luminance sensitivity of the ON channel. Luminance vs. response plots for ON terminals. Red circles compare this function at ZT 1 hr under control conditions (solid circle) and after injection of the non-selective dopamine receptor agonist ADTN ( $\sim 0.2\ \mu M$ ; open circles). ADTN caused a prompt change in the luminance-response function to forms measured at ZT 10 hrs (solid black circles), increasing  $R_{max}$  from  $0.53 \pm 0.02$  to  $1.02 \pm 0.07$ , and reducing  $I_{1/2}$  from  $0.88 \pm 0.18\ nW\ mm^{-2}$  to  $0.05 \pm 0.02\ nW\ mm^{-2}$  ( $\pm$  sd, as estimated from the fitted Hill function shown). The higher gain and luminance sensitivity at ZT 10 hrs could be explained as an effect of dopamine at D2 receptors, because it was completely reversed by injection of the selective D2 receptor antagonist sulpiride ( $\sim 2\ \mu M$ ; open black circles;  $R_{max} = 0.57 \pm 0.13$ ,  $I_{1/2} = 1.16 \pm 1.34\ nW\ mm^{-2}$ ). Results collected from  $n = 535$  terminals from 38 fish. **C.** Effects of manipulating dopamine signalling on luminance sensitivity of the OFF channel. Comparing control responses at ZT 1 hr and 10 hrs showed a significant reduction in  $I_{1/2}$  from  $3.9 \pm 1.3$  to  $0.0128 \pm 0.005$ , but *without* a significant change in  $R_{max}$  ( $0.35 \pm 0.03$  vs  $0.30 \pm 0.02$ ). ADTN injected at ZT 1 caused a prompt increase in luminance sensitivity, reducing  $I_{1/2}$  to  $0.013 \pm 0.005\ nW\ mm^{-2}$ . The higher luminance sensitivity at ZT 10 hrs could be partly explained as an effect of dopamine at D2 receptors, because injection of sulpiride ( $\sim 2\ \mu M$ ; open black circles) increased  $I_{1/2}$  from  $0.05 \pm 0.01\ nW\ mm^{-2}$  to  $0.35 \pm 0.14\ nW\ mm^{-2}$ . Results collected from  $n = 355$  terminals from 38 fish.



572 **Supplementary Figure 2**

573

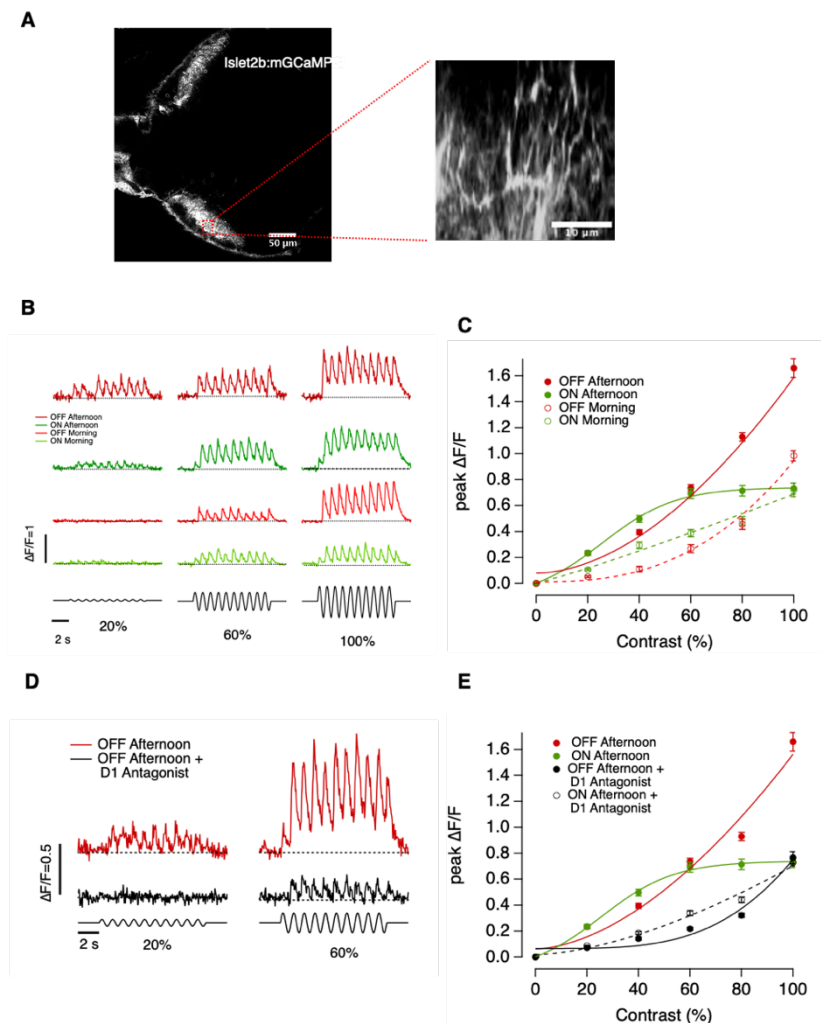

574

575 **Figure S2: Diurnal changes in the visual signal delivered to the optic tectum**

576 **A. Left panel.** Multiphoton section through the tectum of a zebrafish larva *islet2b::mGCaMP6f* (7 dpf)  
 577 expressing the calcium reporter mGCaMP6f, which labels axons and synaptic terminals of retinal ganglion  
 578 cells (RGCs). **Right panel.** Blow-up of the square red shown in the left panel. The image shows the Z  
 579 plane reconstruction from where the synaptic responses were recorded. **B.** mGCaMP6f signals from  
 580 individual ON and OFF RGCs synapses elicited using a stimulus contrasts of 20%, 60% and 100 %  
 581 modulated at 1 Hz (full field, sine wave) **C.** Average contrast-response functions displayed by ON and  
 582 OFF RGCs, where the response ( $R$ ) was quantified as the average of the fluorescence peak amplitudes  
 583 measured at each cycle of stimulation. Each point shows the mean  $\pm$  s.e.m. Note the differences in the  
 584 magnitude of the responses between OFF RGCs in the morning relative to afternoon. **D.** mGCaMP6f  
 585 signals from an individual OFF RGCs before and after intravitreal injection of the D1 antagonist in the  
 586 afternoon. **E.** Average contrast-response function displayed by ON and OFF RGCs before and after  
 587 administration of the D1 antagonist in the afternoon. Note the dramatic decrease in the magnitude of the  
 588 response in both ON and OFF channels.

589

590 **Supplementary Figure 3**  
591  
592

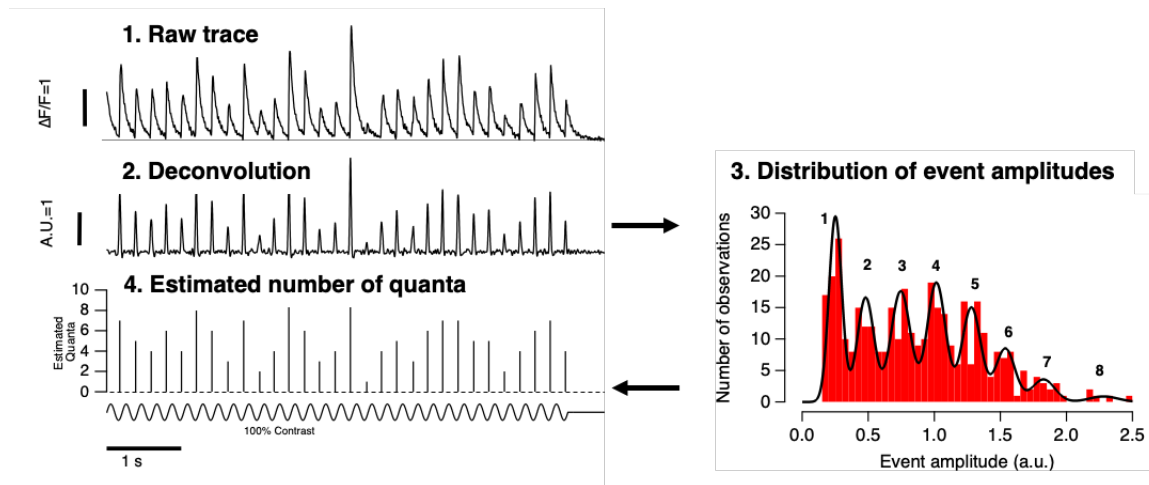

593 **Figure S3. Decomposition of iGluSnFR signals into vesicle counts**  
594 Summary of the basic steps for quantal decomposition of iGluSnFR signals. 1. Raw trace extracted from  
595 individual active zones (linescan, 1 KHz). 2. Deconvolved trace using the estimated Wiener filter. 3.  
596 Histogram of event amplitudes for a representative active zone (373 events accumulated using stimulus  
597 contrasts of 20%, 60% and 100% and a frequency of 5 Hz). The black line is a fit of eight Gaussians,  
598 identified using a Gaussian mixture model. Note that the variance of successive Gaussians did not  
599 increase in proportion to the peak number. The first peak had a value of 0.24, and the distance between  
600 peaks averaged 0.25, indicating the existence of a quantal event equivalent to ~0.25. .4. Estimation of the  
601 number of quanta per event. For more details about analyses see James et al., 2019.  
602  
603

## 604 **Methods**

605

### 606 **Zebrafish husbandry**

607 Fish were raised and maintained under standard conditions on a 14 h light/10 h dark  
608 cycle<sup>35</sup>. To aid imaging, fish were heterozygous or homozygous for the casper mutation  
609 which results in hypopigmentation and they were additionally treated with 1-phenyl-2-  
610 thiourea (200  $\mu$ M final concentration; Sigma) from 10 hours post fertilization (hpf) to  
611 reduce pigmentation. All animal procedures were performed in accordance with the  
612 Animal Act 1986 and the UK Home Office guidelines and with the approval of the  
613 University of Sussex Animal Welfare and Ethical Review Board. More information about  
614 experimental design and reagents is available in the Life Sciences reporting Summary.

615

### 616 **Transgenic fish**

617 Experiments were carried out using the following transgenic lines of zebrafish:

618 i) *Tg(ribeye::Zf-SyGCaMP2)* expressing the synaptically-localized fluorescent calcium  
619 reporter SyGCaMP 2.0 in retinal bipolar cells under the ribeye-A promoter<sup>24</sup>.

620 ii) *Tg(-1.8ctbp2:Gal4VP16\_BH)* fish that drive the expression of the transcriptional  
621 activator protein Gal4VP16 were generated by co-injection of I-SceI meganuclease and  
622 endofree purified plasmid into wild-type zebrafish with a mixed genetic background. A  
623 myocardium-specific promoter that drives the expression of mCherry protein was  
624 additionally cloned into the plasmid to allow for phenotypical screening of founder fish.

625 iii) *Tg(10xUAS:iGluSnFR\_MH)* fish driving the expression of the glutamate sensor  
626 iGluSnFR under the regulatory control of the 10 x UAS enhancer elements were  
627 generated by co-injection of purified plasmid and tol2 transposase RNA into offspring of  
628 AB wildtype fish outcrossed to casper wildtype fish. The sequences for the myocardium-  
629 specific promoter driving the expression of enhanced green fluorescent protein (mossy  
630 heart) were added to the plasmid to facilitate the screening process.

631 iv) *Tg(-1.8ctbp2:SyGCaMP6)* fish were generated by co-injection of I-SceI  
632 meganuclease and endofree purified plasmid into wild-type zebrafish with a mixed  
633 genetic background. The GCaMP6f variant was kindly provided by L. Looger (Janelia  
634 Farm). This variant holds a T383S mutation in comparison to the commercially available  
635 GCaMP6-fast version (Addgene plasmid 40755).

636 v) *Tg(isl2b:nlsTrpR, tUAS:memGCaMP6f)* which drives the expression of  
637 memGCaMP6f in the optic tectum was generated by co-injecting pTol2-isl2b-hlsTrpR-pA  
638 and pBH-tUAS-memGCaMP6f-pA plasmids into single-cell stage eggs. Injected fish were  
639 out-crossed with wild-type fish to screen for founders.

640

#### 641 **Multiphoton Imaging *In Vivo***

642 Experiments were carried out in a total of 117 zebrafish larvae (7–9 days post-  
643 fertilization). Fish were immobilized in 3% low melting point agarose (Biogene) in E2  
644 medium on a glass coverslip (0 thickness) and mounted in a chamber where they were  
645 superfused with E2. Imaging was carried out using a two-photon microscope (Scientifica)  
646 equipped with a mode-locked titanium-sapphire laser (Chameleon, Coherent) tuned to  
647 915 nm and an Olympus XLUMPlanFI 20x water immersion objective (NA 0.95). To  
648 prevent eye movements, the ocular muscles were paralyzed by injection of 1 nL of  $\alpha$ -  
649 bungarotoxin (2 mg/mL) behind the eye. Most imaging was carried out in the dorsal the  
650 retina.

651 The signal-to-noise ratio of the microscope was optimized by collecting photons  
652 through both the objective and a sub-stage oil condenser (Olympus, NA 1.4). Emission  
653 was filtered through GFP filters (HQ 535/50, Chroma Technology) before detection with  
654 GaAsP photomultipliers (H7422P-40, Hamamatsu). The signal from each detector passed  
655 through a current-to-voltage converter and then the two signals were added by a  
656 summing amplifier before digitization. Scanning and image acquisition were controlled  
657 under ScanImage v.3.6 software<sup>52</sup>. In iGluSnFR recordings images were acquired at  
658 10 Hz (128 × 100 pixels per frame, 1 ms per line) while linescans were acquired at 1 kHz.

659 In GCaMP recordings images were acquired at 20 Hz (128 × 50 pixels per frame, 1 ms  
660 per line). Full-field light stimuli were generated by an amber LED ( $I_{\max} = 590$  nm,  
661 Thorlabs), filtered through a 590/10 nm BP filter (Thorlabs), and delivered through a light  
662 guide placed close to the eye of the fish. These wavelengths will most effectively  
663 stimulate red and green cones. The microscope was synchronized to visual stimulation.

664

### 665 **Stimulation protocols**

666 Measurements of contrast sensitivity with SyGCaMP2 were made by stimulating the fish  
667 with a series of 10 s stimuli (full-field sinusoidal modulation at 5 Hz) around a mean  
668 intensity of 55 nW mm<sup>-2</sup>. Measurements of contrast sensitivity with iGluSnFR used 2 s  
669 stimuli. To measure the distribution of events amplitudes and the temporal precision fish  
670 were continuously stimulated for 30 s at a given contrast.

671 Luminance sensitivity was assessed by stimulating the fish with a series of light steps  
672 (4 x 3 s) at 9 different light intensities increasing in steps of 0.5 log unit steps ranging from  
673 11 pW mm<sup>-2</sup> to 110 nW mm<sup>-2</sup> (equivalent to 3.3 x 10<sup>11</sup> photons mm<sup>-2</sup>).

674

### 675 **Drug injections**

676 Dopamine signalling was manipulated by injecting the antagonist of D1 receptors SCH  
677 23390 at a final estimated concentration of 200 nM (Sigma). Finally, the long-lasting  
678 dopamine receptor ligand [3H] 2-amino-6,7-dihydroxy 1,2,3,4-tetrahydronaphthalene  
679 (ADTN) (Sigma) was injected to a final estimated concentration of 200 nM. We confirmed  
680 that these drugs gained access by including 1 mM Alexa 594 in the injection needle;  
681 within 5 mins of injection the dye could be detected within the inner plexiform layer of the  
682 retina. Vehicle injection did not affect synaptic responses to varying contrast.

683

## 684 Calculation of temporal jitter

685 In order to quantify variability in the timing of glutamatergic events, we first calculated the  
686 vector strength,  $r_q$ , for events composed of  $q$  quanta:

$$687 \quad r_q = \frac{1}{N_q} \sqrt{\left( \sum_{i=1}^{N_q} \cos \left( \frac{2\pi t_{q_i}}{T} \right) \right)^2 + \left( \sum_{i=1}^{N_q} \sin \left( \frac{2\pi t_{q_i}}{T} \right) \right)^2} \quad (1)$$

688 where  $t_{q_i}$  is the time of the  $i^{\text{th}}$   $q$ -quantal event,  $T$  is the stimulus period, and  $N_q$  is the total  
689 number of events of composed of  $q$ -quanta. The temporal jitter,  $J_q$ , can then be calculated  
690 as:

$$691 \quad J_q = \frac{\sqrt{2(1-r_q)}}{2\pi f} \quad (2)$$

692 where  $f$  is the stimulus frequency.

693

## 694 Calculations based on Information Theory

695 To quantify the amount of information about a visual stimulus that is contained within  
696 the sequence of release events from an active zone we first needed to convert bipolar  
697 cell outputs into a probabilistic framework from which we could evaluate the specific  
698 information ( $I_2$ ), a metric that quantifies how much information about one random  
699 variable is conveyed by the observation a specific symbol of another random  
700 variable<sup>36</sup>. The time series of quantal events was converted into a probability  
701 distribution by dividing into time bins of 20 ms, such that each bin contained either zero  
702 events or one event of an integer amplitude. We then counted the number of bins  
703 containing events of amplitude 1, or 2, or 3 etc. By dividing the number of bins of each  
704 type by the total number of bins for each different stimulus, we obtained the conditional  
705 distribution of  $\mathbf{Q}$  given  $\mathbf{S}$ ,  $p(\mathbf{Q}|\mathbf{S})$ , where  $\mathbf{Q}$  is the random variable representing the  
706 *quanta/bin* and  $\mathbf{S}$  is the random variable representing the *stimulus contrasts* presented  
707 throughout the course of the experiment. In the absence of information about the  
708 distribution of contrasts normally experienced by a larval zebrafish, a uniform

709 distribution of contrasts was used for  $\mathbf{S}$ . Each contrast step lasted 2 s (5 Hz) and they  
 710 were presented in two different pseudo-random orders, of which one is shown in Fig.  
 711 4D. The contrast sensitivity varied between synapses and between morning and  
 712 afternoon (Fig. 1E-G) so to make allowance for this the stimulus set  $\mathbf{S}$  was adjusted for  
 713 each synapse to span contrasts  $\pm 10\%$  around  $C_{1/2}$  measured within that synapse.

714 We computed the joint probability distribution by the chain rule for probability (given  
 715 the experimentally defined uniform distribution of stimuli  $\mathbf{S}$ ):

$$716 \quad p(\mathbf{S}, \mathbf{Q}) = p(\mathbf{Q}|\mathbf{S})p(\mathbf{S}) \quad (7)$$

717 In order to convert this distribution into the conditional distribution of  $\mathbf{S}$  given  $\mathbf{Q}$ , we used  
 718 the definition of the conditional distribution:

$$719 \quad p(\mathbf{S}|\mathbf{Q}) = \frac{p(\mathbf{S}, \mathbf{Q})}{p(\mathbf{Q})} \quad (8)$$

720 From these distributions we computed two metrics: the mutual information  $I(\mathbf{S}; \mathbf{Q})^{53}$  and  
 721 specific information  $I_2(\mathbf{S}; \mathbf{q})^{37}$ . Mutual information is defined traditionally as:

$$722 \quad I(\mathbf{S}; \mathbf{Q}) = H(\mathbf{S}) - H(\mathbf{S}|\mathbf{Q}) \quad (9)$$

$$723 \quad I(\mathbf{S}; \mathbf{Q}) = \sum_{s \in \mathbf{S}} \sum_{q \in \mathbf{Q}} p(s, q) \log_2 \frac{p(s)p(q)}{p(s, q)} = I(\mathbf{Q}; \mathbf{S}) \quad (10)$$

724 The specific information,  $I_2(\mathbf{S}; \mathbf{q})$ , is defined as the difference between the entropy of the  
 725 stimulus  $\mathbf{S}$  minus the conditional entropy of the stimulus given the observed symbol in the  
 726 response  $q$ :

$$727 \quad I_2(\mathbf{S}, q) = H(\mathbf{S}) - H(\mathbf{S}|q) \quad (11)$$

$$728 \quad I_2(\mathbf{S}, q) = - \sum_{s \in \mathbf{S}} p(s) \log p(s) + \sum_{s \in \mathbf{S}} p(s|q) \log p(s|q) \quad (12)$$

729 representing the amount of information observing each quantal event type  $q \in \mathbf{Q}$  carries  
 730 about the stimulus distribution  $\mathbf{S}$ . Note that mutual information can also be computed from  
 731 the specific information as the dot product of the specific information vector  $\mathbf{I}_2$  and the  
 732 vector describing the probability of an event of a given quantal size  $p(\mathbf{q})$ . This adds to the  
 733 interpretability of both metrics – the specific information is the amount of information a

734 single (specific) symbol gives about the stimulus, and the mutual information is the  
735 average amount of information about the stimulus gained from observing any symbol.

736 Measuring entropy and mutual information from neural responses can be a  
737 challenging problem. Estimates require sampling from an unknown discrete probability  
738 distribution, and in many cases recording sufficient samples to observe all non-zero  
739 probability events is neither tractable nor practical. The biases introduced by  
740 undersampling can be a particular problem when the full support of the distribution (all  
741 values that map to non-zero probabilities) is high. Within the past few decades, various  
742 approaches to correcting biases in information theoretic analyses have been developed<sup>54</sup>.  
743 However, as the distributions of interest in this work have both a small support and are  
744 well sampled, we have opted to use standard estimates for the quantities of interest.

745

#### 746 **Statistics**

747 All data are given as mean  $\pm$  s.e.m. unless otherwise stated in the figure legends. All  
748 statistical tests met appropriate assumptions and were calculated using inbuilt  
749 functions in IgorPro (Wavemetrics). When data were not normally distributed we used  
750 non-parametric tests. Significance was defined as  $p < 0.05$ . Data collection was not  
751 randomized because all experiments were carried out within one set of animals.  
752 Delivery of different stimuli was randomized where appropriate. Data were only  
753 excluded from the analysis if the signal-to-noise ratio (SNR) of the iGluSnFR signals  
754 elicited at a given synapse was not sufficient to detect unitary responses to visual stimuli  
755 with a SNR of at least three.

756

757

758



759 **References**

760

- 761 1 Bargmann, C. I. & Marder, E. From the connectome to brain function. *Nat Methods* **10**, 483-  
762 490, doi:nmeth.2451 [pii]  
763 10.1038/nmeth.2451 (2013).
- 764 2 Kastner, D. B. & Baccus, S. A. Coordinated dynamic encoding in the retina using opposing  
765 forms of plasticity. *Nature neuroscience* **14**, 1317 (2011).
- 766 3 Johnston, J. *et al.* A Retinal Circuit Generating a Dynamic Predictive Code for Oriented  
767 Features. *Neuron* **102**, 1211-1222 e1213, doi:10.1016/j.neuron.2019.04.002 (2019).
- 768 4 Esposti, F., Johnston, J., Rosa, J. M., Leung, K. M. & Lagnado, L. Olfactory stimulation  
769 selectively modulates the OFF pathway in the retina of zebrafish. *Neuron* **79**, 97-110,  
770 doi:10.1016/j.neuron.2013.05.001 (2013).
- 771 5 Schroder, S. *et al.* Arousal Modulates Retinal Output. *Neuron* **107**, 487-495 e489,  
772 doi:10.1016/j.neuron.2020.04.026 (2020).
- 773 6 Ribelayga, C., Cao, Y. & Mangel, S. C. The circadian clock in the retina controls rod-cone  
774 coupling. *Neuron* **59**, 790-801, doi:10.1016/j.neuron.2008.07.017 (2008).
- 775 7 Li, L. Circadian Vision in Zebrafish: From Molecule to Cell and from Neural Network to  
776 Behavior. *J Biol Rhythms* **34**, 451-462, doi:10.1177/0748730419863917 (2019).
- 777 8 Zang, J. *et al.* Circadian regulation of vertebrate cone photoreceptor function. *eLife* **10**,  
778 e68903, doi:10.7554/eLife.68903 (2021).
- 779 9 Jackson, C. R. *et al.* Retinal dopamine mediates multiple dimensions of light-adapted vision.  
780 *The Journal of neuroscience : the official journal of the Society for Neuroscience* **32**, 9359-9368,  
781 doi:10.1523/JNEUROSCI.0711-12.2012 (2012).
- 782 10 Euler, T., Haverkamp, S., Schubert, T. & Baden, T. Retinal bipolar cells: elementary building  
783 blocks of vision. *Nat Rev Neurosci* **15**, 507-519, doi:10.1038/nrn3783 (2014).
- 784 11 Nikolaev, A., Leung, K. M., Odermatt, B. & Lagnado, L. Synaptic mechanisms of adaptation  
785 and sensitization in the retina. *Nat Neurosci* **16**, 934-941, doi:10.1038/nn.3408 (2013).
- 786 12 Zimmermann, M. J. Y. *et al.* Zebrafish Differentially Process Color across Visual Space to  
787 Match Natural Scenes. *Curr Biol* **28**, 2018-2032.e2015, doi:10.1016/j.cub.2018.04.075 (2018).
- 788 13 Matsumoto, A. *et al.* Direction selectivity in retinal bipolar cell axon terminals. *Neuron* (2021).
- 789 14 Lagnado, L. & Schmitz, F. Ribbon Synapses and Visual Processing in the Retina. *Annu Rev*  
790 *Vis Sci* **1**, 235-262, doi:10.1146/annurev-vision-082114-035709 (2015).
- 791 15 Glowatzki, E. & Fuchs, P. A. Transmitter release at the hair cell ribbon synapse. *Nat*  
792 *Neurosci* **5**, 147-154, doi:10.1038/nn796 (2002).
- 793 16 Singer, J. H., Lassoova, L., Vardi, N. & Diamond, J. S. Coordinated multivesicular release at a  
794 mammalian ribbon synapse. *Nat Neurosci* **7**, 826-833, doi:10.1038/nn1280 (2004).
- 795 17 James, B., Darnet, L., Moya-Diaz, J., Seibel, S. H. & Lagnado, L. An amplitude code  
796 transmits information at a visual synapse. *Nat Neurosci* **22**, 1140-1147, doi:10.1038/s41593-019-  
797 0403-6 (2019).
- 798 18 Lisman, J. E., Raghavachari, S. & Tsien, R. W. The sequence of events that underlie quantal  
799 transmission at central glutamatergic synapses. *Nat Rev Neurosci* **8**, 597-609,  
800 doi:10.1038/nrn2191 (2007).
- 801 19 Huang, C.-H., Bao, J. & Sakaba, T. Multivesicular Release Differentiates the Reliability of  
802 Synaptic Transmission between the Visual Cortex and the Somatosensory Cortex. *The Journal of*  
803 *Neuroscience* **30**, 11994, doi:10.1523/JNEUROSCI.2381-10.2010 (2010).

- 804 20 Holler, S., Köstinger, G., Martin, K. A. C., Schuhknecht, G. F. P. & Stratford, K. J. Structure  
805 and function of a neocortical synapse. *Nature* **591**, 111-116, doi:10.1038/s41586-020-03134-2  
806 (2021).
- 807 21 Shannon, C. A Mathematical Theory of Communication. *Bell System Technical Journal* **27**,  
808 379-423 (1948).
- 809 22 Borst, A. & Theunissen, F. E. Information theory and neural coding. *Nat Neurosci* **2**, 947-957,  
810 doi:10.1038/14731 (1999).
- 811 23 Marvin, J. S. *et al.* An optimized fluorescent probe for visualizing glutamate  
812 neurotransmission. *Nat Methods* **10**, 162-170, doi:10.1038/nmeth.2333 (2013).
- 813 24 Dreosti, E., Odermatt, B., Dorostkar, M. M. & Lagnado, L. A genetically encoded reporter of  
814 synaptic activity in vivo. *Nat Methods* **6**, 883-889, doi:10.1038/nmeth.1399 (2009).
- 815 25 Emran, F., Rihel, J., Adolph, A. R. & Dowling, J. E. Zebrafish larvae lose vision at night.  
816 *Proceedings of the National Academy of Sciences* **107**, 6034, doi:10.1073/pnas.0914718107  
817 (2010).
- 818 26 Nie, K. *et al.* Effects of circadian clock protein Per1b on zebrafish visual functions.  
819 *Chronobiology international* **35**, 160-168 (2018).
- 820 27 Ashmore, J. & Copenhagen, D. An analysis of transmission from cones to hyperpolarizing  
821 bipolar cells in the retina of the turtle. *The Journal of Physiology* **340**, 569-597 (1983).
- 822 28 Faisal, A. A., Selen, L. P. & Wolpert, D. M. Noise in the nervous system. *Nat Rev Neurosci* **9**,  
823 292-303, doi:10.1038/nrn2258 (2008).
- 824 29 Rusakov, D. A., Savtchenko, L. P. & Latham, P. E. Noisy Synaptic Conductance: Bug or a  
825 Feature? *Trends Neurosci* **43**, 363-372, doi:10.1016/j.tins.2020.03.009 (2020).
- 826 30 Berry, M. J., Warland, D. K. & Meister, M. The structure and precision of retinal spike trains.  
827 *Proceedings of the National Academy of Sciences* **94**, 5411, doi:10.1073/pnas.94.10.5411 (1997).
- 828 31 Churchland, M. M. *et al.* Stimulus onset quenches neural variability: a widespread cortical  
829 phenomenon. *Nature Neuroscience* **13**, 369-378, doi:10.1038/nn.2501 (2010).
- 830 32 Rathbun, D. L., Warland, D. K. & Usrey, W. M. Spike timing and information transmission at  
831 retinogeniculate synapses. *Journal of Neuroscience* **30**, 13558-13566 (2010).
- 832 33 Cui, Y., Wang, Y. V., Park, S. J. H., Demb, J. B. & Butts, D. A. Divisive suppression explains  
833 high-precision firing and contrast adaptation in retinal ganglion cells. *eLife* **5**, e19460,  
834 doi:10.7554/eLife.19460 (2016).
- 835 34 Freed, M. A. Quantal encoding of information in a retinal ganglion cell. *J Neurophysiol* **94**,  
836 1048-1056, doi:10.1152/jn.01276.2004 (2005).
- 837 35 Odermatt, B., Nikolaev, A. & Lagnado, L. Encoding of luminance and contrast by linear and  
838 nonlinear synapses in the retina. *Neuron* **73**, 758-773, doi:10.1016/j.neuron.2011.12.023 (2012).
- 839 36 Stone, J. V. *Principles of Neural Information Theory: Computational Neuroscience and*  
840 *Metabolic Efficiency* (Sebtel Press, 2018).
- 841 37 DeWeese, M. R. & Meister, M. How to measure the information gained from one symbol.  
842 *Network* **10**, 325-340 (1999).
- 843 38 Attwell, D. & Laughlin, S. B. An energy budget for signaling in the grey matter of the brain.  
844 *Journal of Cerebral Blood Flow & Metabolism* **21**, 1133-1145 (2001).
- 845 39 Harris, Julia J., Jolivet, R. & Attwell, D. Synaptic Energy Use and Supply. *Neuron* **75**, 762-  
846 777, doi:<https://doi.org/10.1016/j.neuron.2012.08.019> (2012).
- 847 40 Koch, K. *et al.* How much the eye tells the brain. *Curr Biol* **16**, 1428-1434,  
848 doi:10.1016/j.cub.2006.05.056 (2006).

- 849 41 Mora - Ferrer, C., Yazulla, S., Studholme, K. M. & Haak - Frendscho, M. Dopamine D1 -  
850 receptor immunolocalization in goldfish retina. *Journal of Comparative Neurology* **411**, 705-714  
851 (1999).
- 852 42 Farshi, P., Fyk-Kolodziej, B., Krolewski, D. M., Walker, P. D. & Ichinose, T. Dopamine D1  
853 receptor expression is bipolar cell type-specific in the mouse retina. *The Journal of comparative*  
854 *neurology* **524**, 2059-2079, doi:10.1002/cne.23932 (2016).
- 855 43 Ribelayga, C., Wang, Y. & Mangel, S. C. A circadian clock in the fish retina regulates  
856 dopamine release via activation of melatonin receptors. *The Journal of Physiology* **554**, 467-482,  
857 doi:<https://doi.org/10.1113/jphysiol.2003.053710> (2004).
- 858 44 Moya-Díaz, J., James, B. & Lagnado, L. Modulation of the vesicle code transmitting the  
859 visual signal in the retina. *bioRxiv*, 2020.2004.2022.056119, doi:10.1101/2020.04.22.056119  
860 (2020).
- 861 45 Thermos, K. Functional mapping of somatostatin receptors in the retina: a review. *Vision*  
862 *Research* **43**, 1805-1815, doi:[https://doi.org/10.1016/S0042-6989\(03\)00169-X](https://doi.org/10.1016/S0042-6989(03)00169-X) (2003).
- 863 46 Freed, M. A. & Liang, Z. Synaptic noise is an information bottleneck in the inner retina during  
864 dynamic visual stimulation. *The Journal of physiology* **592**, 635-651,  
865 doi:10.1113/jphysiol.2013.265744 (2014).
- 866 47 McDonnell, M. D. & Ward, L. M. The benefits of noise in neural systems: bridging theory and  
867 experiment. *Nature Reviews Neuroscience* **12**, 415-425, doi:10.1038/nrn3061 (2011).
- 868 48 Christie, J. M. & Jahr, C. E. Multivesicular release at Schaffer collateral-CA1 hippocampal  
869 synapses. *The Journal of neuroscience : the official journal of the Society for Neuroscience* **26**,  
870 210-216, doi:10.1523/JNEUROSCI.4307-05.2006 (2006).
- 871 49 Auger, C., Kondo, S. & Marty, A. Multivesicular release at single functional synaptic sites in  
872 cerebellar stellate and basket cells. *The Journal of neuroscience : the official journal of the*  
873 *Society for Neuroscience* **18**, 4532-4547 (1998).
- 874 50 Higley, M. J., Soler-Llavina, G. J. & Sabatini, B. L. Cholinergic modulation of multivesicular  
875 release regulates striatal synaptic potency and integration. *Nature neuroscience* **12**, 1121-1128  
876 (2009).
- 877 51 Chalifoux, J. R. & Carter, A. G. GABAB receptors modulate NMDA receptor calcium signals  
878 in dendritic spines. *Neuron* **66**, 101-113 (2010).
- 879 52 Pologruto, T. A., Sabatini, B. L. & Svoboda, K. ScanImage: flexible software for operating  
880 laser scanning microscopes. *Biomed Eng Online* **2**, 13, doi:10.1186/1475-925X-2-13 (2003).
- 881 53 de Ruyter van Steveninck, R. R., Lewen, G. D., Strong, S. P., Koberle, R. & Bialek, W.  
882 Reproducibility and variability in neural spike trains. *Science* **275**, 1805-1808,  
883 doi:10.1126/science.275.5307.1805 (1997).
- 884 54 Pola, G., Schultz, S. R., Petersen, R. S & Panzeri, S. in *Neuroscience Databases: A Practical*  
885 *Guide* (Springer, Boston, MA, 2003).
- 886
